# Supplementary material for: A global reference database in FAOSTAT of cropland nutrient budgets and nutrient use efficiency: nitrogen, phosphorus and potassium, 1961–2020
Source: Copernicus journal article supplement (doi:10.5194/essd-2023-206), 2023-07-17
Supplement: Supplementary file 1 [file essd-2023-206-supplement.pdf]

## Supplementary Material 1- Fraction of N fertilizer applied to cropland (CF)

Estimates of the percent of synthetic N applied to major crops by country (CF) were collected from 4 major datasets:

1. Fertilizer use by crop (FUBC) reports published in 2022 (Ludemann et al., 2022a) and 2017 (Heffer et al., 2017) by the International Fertilizer Association (IFA) and collated by Ludemann et al. (2022a);
2. Updated estimates from FAO for the countries of New Zealand and Ireland (FAO, 2022d);
3. Fraction estimates for European Countries from Einarsson et al. (2021); &
4. Models of national nitrogen budgets for crop production compared in Zhang et al. (2021).

CF cropland fraction estimates for N were derived by Heffer et al. (2017) as the fraction of crop N-use excluding ‘Grassland’ and ‘Other Crops;’ whereas, Ludemann et al. (2022a) estimates were derived as the fraction of crop N-use excluding ‘Grassland’ and ‘Residual.’ Fractions from Einarsson et al. (2021) calculated N share to cropland as  $Q_C/Q$  (total agriculture use of fertilizer to cropland/Total quantity of synthetic N fertilizer applied; Supplementary Figure 1a). Models compared in Zhang et al. (2021) reported N synthetic fertilizer inputs for major crops; thus, CF was derived by dividing these modelled input amounts over the total amount of N fertilizer use reported by FAO for each given country and year. This method resulted in some fraction estimates greater than 100% which required additional screening of data before determining our final report on suggested CF estimates. The initial screening applied to CF estimates from models compared in Zhang et al. (2021) followed the following sequence of steps for data screening, smoothing, and gap filling (See also Supplementary Figure 1b):

1. For each country, identify data points >100%
  - a. If these data points account for >30% of the time series (i.e., consistently overestimate the attribution of N to major crops), then remove the whole time series from consideration. If these data points account for >0% and <=30%, then smooth the time series (loess smoothing). After smoothing and if the series’ still have values >100%, remove, and fill the gap with the average of adjacent data (linear interpolation).
2. Following our final selection of fraction estimates, we proceeded to repeat last and first data backwards and forwards, respectively for each selected time series.

For those countries that we believe an update is needed (Supplementary Table 1) and that have multiple time series estimates from various data sources, we recommended the appropriate data source by considering the following criteria:

1. the time series’ closest to FAO or IFA estimates in recent years were considered to be a more accurate data source; and
2. the smoother time series with smaller year-to-year fluctuations should be prioritised .

(a)

**Derivation of CF for N**

*datasets used in the derivation of CF N estimates and the methods for calculation*

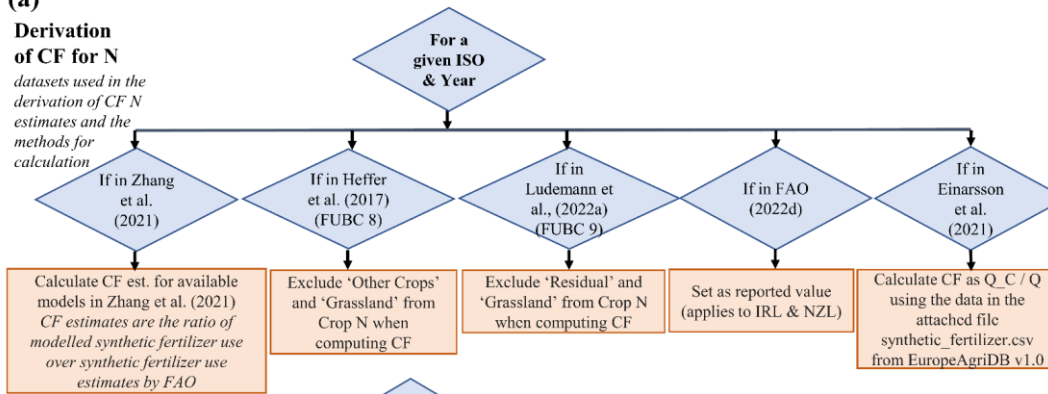

**Major Datasets:**

- (1) Einarsson et al. (2021)
- (2) FAO (2022d)
- (3) Ludemann et al. (2022a) (2 Datasets)
  - FUBC report #8: Heffer et al. (2017)
  - FUBC report #9
- (4) Zhang et al., 2021 (8 Datasets)
  - Bodirsky without forage
  - Chang et al.
  - Conant and Dorich
  - Gerber and Mueller
  - IMAGE
  - Lassaletta et al.
  - Lu and Tian
  - Zhang Reorganized

(b)

**Screening Techniques for Zhang et al. (2021) estimates\***

*\*the data quality of these particular estimates needs to be carefully evaluated, and irregular values (e.g., values higher than 100%) need to be removed, in order to provide reasonable estimates.*

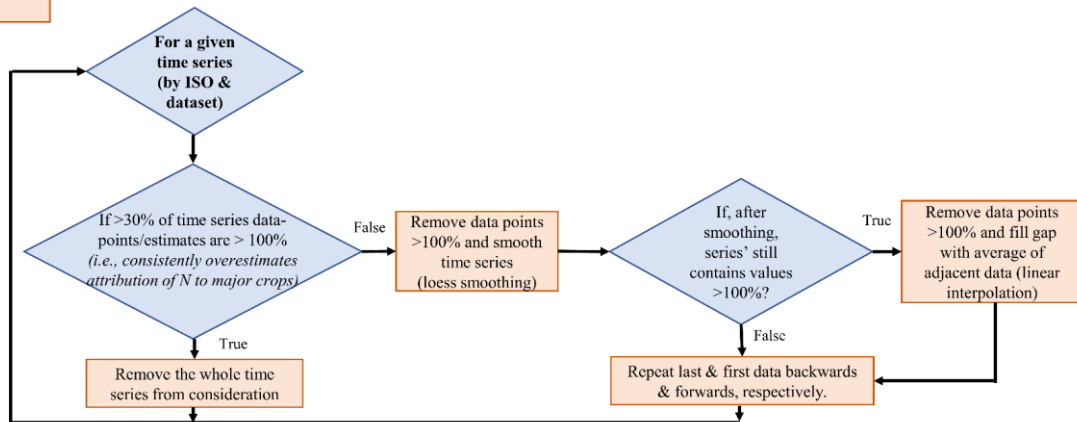

35

**Supplementary Figure 1:** Decision trees detailing initial derivation of fraction of N fertilizer applied to cropland (CF) estimates for N based on the major datasets considered for this analysis, and (b) additional data screening steps for cropland fraction estimates derived from Zhang et al (2021) datasets.

40

**Supplementary Table 1: Outlined methods of data preparation for N fraction estimates for 21 specific country time series (1961-2020). All analyzed models are from the Zhang et al., 2021, dataset received the same standard, initial data preparation and initial screening techniques.**

| ISO3<br>country<br>code | Data Preparation Steps                                                                                                                                          | Source                                                |
|-------------------------|-----------------------------------------------------------------------------------------------------------------------------------------------------------------|-------------------------------------------------------|
| AUS                     | (1) Standard filtering, gap-filling, and interpolation methods*                                                                                                 | Lassaletta et al. (2014);<br>Lassaletta et al. (2016) |
| AUT                     | (1) Projected first (oldest) & last (most recent) data backwards and forwards, respectively.                                                                    | Einarsson et al. (2021)                               |
| BRA                     | (1) Standard filtering, gap-filling, and interpolation methods                                                                                                  | Bouwman et al. (2013)                                 |
| CAN                     | (1) Standard filtering, gap-filling, and interpolation methods; followed by (2) removal of post-2011 values and projection of 2011 value forwards through time. | Zhang et al. (2021)                                   |
| CHL                     | (1) Standard filtering, gap-filling, and interpolation methods; followed by (2) removal of post-2011 values and projection of 2011 value forwards through time. | Zhang et al. (2021)                                   |
| DEU                     | (1) Projected first (oldest) & last (most recent) data backwards and forwards, respectively.                                                                    | Einarsson et al. (2021)                               |
| FIN                     | (1) Standard filtering, gap-filling, and interpolation methods.                                                                                                 | Lassaletta et al. (2014);<br>Lassaletta et al. (2016) |
| FRA                     | (1) Projected first (oldest) & last (most recent) data backwards and forwards, respectively.                                                                    | Einarsson et al. (2021)                               |
| GBR                     | (1) Projected first (oldest) & last (most recent) data backwards and forwards, respectively.                                                                    | Einarsson et al. (2021)                               |
| IRL                     | (1) Projected first (oldest) & last (most recent) data backwards and forwards, respectively.                                                                    | Einarsson et al. (2021)                               |

|     |                                                                                                                                                                 |                         |
|-----|-----------------------------------------------------------------------------------------------------------------------------------------------------------------|-------------------------|
| JPN | (1) Standard filtering, gap-filling, and interpolation methods; followed by (2) removal of post-2011 values and projection of 2011 value forwards through time. | Zhang et al. (2021)     |
| LUX | (1) Projected first (oldest) & last (most recent) data backwards and forwards, respectively.                                                                    | Einarsson et al. (2021) |
| MAR | (1) Standard filtering, gap-filling, and interpolation methods; followed by (2) removal of post-2011 values and projection of 2011 value forwards through time. | Zhang et al. (2021)     |
| NLD | (1) Projected first (oldest) & last (most recent) data backwards and forwards, respectively.                                                                    | Einarsson et al. (2021) |
| NZL | Applied 8% across the time series.                                                                                                                              | FAO (2022d).            |
| POL | (1) Projected first (oldest) & last (most recent) data backwards and forwards, respectively.                                                                    | Einarsson et al. (2021) |
| SVN | (1) Projected first (oldest) & last (most recent) data backwards and forwards, respectively.                                                                    | Einarsson et al. (2021) |
| URY | (1) Standard filtering, gap-filling, and interpolation methods; followed by (2) removal of post-2011 values and projection of 2011 value forwards through time. | Zhang et al. (2021)     |
| USA | (1) Standard filtering, gap-filling, and interpolation methods.                                                                                                 | Zhang et al. (2021)     |
| ZAF | (1) Standard filtering, gap-filling, and interpolation methods; followed by (2) removal of post-2011 values and projection of 2011 value forwards through time. | Zhang et al. (2021)     |

---

## Supplementary Material 2- Biological nitrogen fixation (BNF)

50 For grain legumes, biological nitrogen fixation (BNF) was estimated using a non-linear model described by Herridge et al. (2022). The model calculates fixation in grain legumes as the total plant N content multiplied by the proportion of N derived from the atmosphere (Ndfa). The total plant N content is calculated from the grain harvest using a harvest index (HI), defined as grain (or pod for groundnut) yield (moisture content 11-14%) as a proportion of total shoot dry matter; shoot N concentration; and a below-ground N factor (BGF), defined as the ratio of total plant N to above-ground plant N. In summary,

55  $fixation = harvest \times \frac{1}{HI} \times shoot\ N\ concentration \times BGF \times Ndfa$  (2).

The full model (Equation 4) is non-linear since the HI, and for soybeans also the shoot N concentration, is assumed dependent on crop yield Y:

$$HI = a + b * \ln(Y) \quad (3),$$

and

60 shoot N concentration = c + d \* Y/HI,

where ln() is the natural logarithm and the yield Y is expressed in metric tonnes per hectare harvested. The yield is the grain yield, except for groundnuts, where the pod yield is used.

The full model can therefore be written

$$fixation = harvest \times \frac{c+d \times \left(\frac{Y}{a+b \ln Y}\right)}{a+b \ln Y} \times BGF \times Ndfa \quad (4).$$

65 Note that each factor of this equation is dimensionless except the harvest. The fixation therefore gets the same unit as the harvest e.g., as in the paper by Herridge et al. (2022) if the harvest is given in million metric tonnes (Tg), then the fixation is in Tg N. The parameters provided by Herridge et al. (2022) are summarized in the table below.

70 **Supplementary Table 2: Coefficients used in the estimation of crop biological nitrogen fixation (BNF), where a, b, c and d indicates non-linear coefficients as described in Equation 4, BGF indicates below-ground N factor, and Ndfa indicates the proportion of N derived from the atmosphere.**

| Crop        | a      | b      | c       | D        | BGF | Ndfa                                   |
|-------------|--------|--------|---------|----------|-----|----------------------------------------|
|             |        |        |         |          |     | 0.44 (Europe);                         |
|             |        |        |         |          |     | 0.61 (North America, Africa, Asia,     |
| Soybean     | 0.2775 | 0.1178 | 0.03913 | -0.00118 | 1.4 | South America except Brazil, Oceania); |
|             |        |        |         |          |     | 0.73 (South/Central America);          |
|             |        |        |         |          |     | 0.78 (Brazil)                          |
| Groundnut   | 0.2614 | 0.1343 | 0.027   | 0        | 1.4 | 0.62                                   |
| Common bean | 0.2839 | 0.0804 | 0.025   | 0        | 1.4 | 0.38                                   |
| Chickpea    | 0.2839 | 0.0804 | 0.019   | 0        | 2.0 | 0.62                                   |
| Pigeon pea  | 0.1647 | 0.0517 | 0.019   | 0        | 2.0 | 0.74                                   |
| Faba bean   | 0.2839 | 0.0804 | 0.025   | 0        | 1.4 | 0.74                                   |
| Lupin       | 0.2839 | 0.0804 | 0.027   | 0        | 1.4 | 0.74                                   |

75 For non-legume crops, BF was estimated following fixed per-hectare coefficients. Rice was assumed to have a BF coefficient of 25 kg N ha<sup>-1</sup> year<sup>-1</sup>. This coefficient was based on multiple lines of evidence. Smil (1999) suggested a N fixation of 20-30 kg N per hectare per cropping season from free-living cyanobacteria, and 50-90 kg N per hectare per cropping season in rice fields with azolla (Genus: Azolla). Assuming 2% of rice fields have azolla and 1.25 rice crops per year, these numbers lead to a total fixation of approximately 33 kg N per hectare per year, which is the estimate used by Herridge et al. (2008). However, since the FAOSTAT production data implicitly accounts for multi-cropping in its harvested areas, the factor 1.25 was not needed. Moreover, as Ladha et al. (2016) characterize azolla and legume green manures in rice as “negligible” and  
80 “insignificant” at present, Smil’s estimate of 20-30 kg N ha<sup>-1</sup> year<sup>-1</sup> from cyanobacteria appears to be an appropriate coefficient. This is in line with 22kg N ha<sup>-1</sup> year<sup>-1</sup> fixation estimation based on crop N budgets by Ladha et al. (2016), and the 10-50 kg N ha<sup>-1</sup> year<sup>-1</sup> range reported by Ladha et al. (2022) based on <sup>15</sup>N isotope methods.

Sugar cane was assume to have a BF of 25 kg N per harvested hectare. This coefficient was suggested by Herridge et al. (2008) based on consideration of multiple lines of evidence. The fixation in sugar cane is subject to a considerable uncertainty. Smil  
85 (1999) suggested that endophytic microbes in sugar cane fix at least 50 kg N/ha/year, maybe up to 150 kg N ha<sup>-1</sup> year<sup>-1</sup> or more. Such high rates have clearly been demonstrated on some fields using various methods (see, e.g., Herridge et al. (2008); Urquiaga et al. (2012);Baptista et al. (2014); Martins et al. (2020)) but were considered unlikely by Herridge et al. (2008) as an average. The coefficient 25 kg N ha<sup>-1</sup> year<sup>-1</sup> harvested used here is considered as a conservative estimate which may be revised upwards in the future.

90

### Supplementary Material 3- Crop removal (CR) coefficients

**Supplementary Table 3: Crop nutrient removal coefficients (in kilograms of nitrogen (N), phosphorus (P) or potassium (K) per tonne of commodity (to 2 significant figures).**

| Item                             | FAO code | N   | P   | K   |
|----------------------------------|----------|-----|-----|-----|
| Almonds, with shell              | 221      | 39  | 11  | 71  |
| Anise, badian, fennel, coriander | 710      | 8.8 | 1.3 | 16  |
| Apples                           | 515      | 2.2 | 0.7 | 4.5 |
| Apricots                         | 526      | 3.7 | 0.7 | 2.2 |
| Areca nuts                       | 226      | 7.8 | NA  | NA  |
| Artichokes                       | 366      | 3.2 | NA  | NA  |
| Asparagus                        | 367      | 4.8 | 0.9 | 4.2 |
| Avocados                         | 572      | 2.7 | 0.9 | NA  |
| Bambara beans                    | 203      | 26  | 5.1 | 15  |
| Bananas                          | 486      | 1.4 | 0.4 | 8.9 |
| Barley                           | 44       | 18  | 3.2 | 5.8 |
| Bastfibres, other                | 782      | 4.3 | 1.1 | 3.3 |
| Beans, dry                       | 176      | 42  | 5.7 | 20  |
| Beans, green                     | 414      | 4.1 | 0.7 | 2.2 |
| Berries nes                      | 558      | 1.6 | NA  | NA  |
| Blueberries                      | 552      | 1.1 | 0.0 | 0.8 |
| Brazil nuts, with shell          | 216      | 11  | NA  | NA  |
| Broad beans, horse beans, dry    | 181      | 30  | 5.1 | 15  |
| Buckwheat                        | 89       | 17  | 2.2 | 3.7 |
| Cabbages and other brassicas     | 358      | 3.8 | 0.4 | 3.0 |
| Canary seed                      | 101      | 20  | 2.9 | 11  |
| Carobs                           | 461      | 2.6 | NA  | NA  |
| Carrots and turnips              | 426      | 2.1 | 0.5 | 2.3 |
| Cashew nuts, with shell          | 217      | 12  | NA  | NA  |
| Cashewapple                      | 591      | 1.3 | NA  | NA  |
| Cassava                          | 125      | 2.7 | 3.3 | 2.6 |
| Castor oil seed                  | 265      | 14  | NA  | NA  |
| Cauliflowers and broccoli        | 393      | 4.0 | 0.9 | 3.2 |
| Cereals nes                      | 108      | 15  | 2.9 | 4.4 |
| Cherries                         | 531      | 1.8 | NA  | NA  |
| Cherries, sour                   | 530      | 1.4 | NA  | NA  |
| Chestnut                         | 220      | 2.9 | NA  | NA  |
| Chick peas                       | 191      | 28  | 5.1 | 15  |
| Chicory roots                    | 459      | 1.8 | NA  | NA  |
| Chillies and peppers, dry        | 689      | 12  | 1.2 | 9.5 |
| Chillies and peppers, green      | 401      | 2.2 | 0.5 | 2.2 |
| Cinnamon (cannella)              | 693      | 12  | 1.3 | 16  |

| Item                               | FAO code | N   | P   | K   |
|------------------------------------|----------|-----|-----|-----|
| Cloves                             | 698      | 19  | 4.0 | 18  |
| Cocoa, beans                       | 661      | 23  | 6.0 | 36  |
| Coconuts                           | 249      | 19  | 3.8 | 6.6 |
| Coffee, green                      | 656      | 23  | 3.5 | 18  |
| Cow peas, dry                      | 195      | 30  | 5.1 | 15  |
| Cranberries                        | 554      | 0.6 | NA  | NA  |
| Cucumbers and gherkins             | 397      | 1.5 | 0.5 | 1.6 |
| Currants                           | 550      | 2.2 | NA  | NA  |
| Dates                              | 577      | 2.4 | NA  | NA  |
| Eggplants (aubergines)             | 399      | 2.8 | 0.8 | 2.9 |
| Fibre crops nes                    | 821      | 4.3 | 1.1 | 3.3 |
| Figs                               | 569      | 3.0 | NA  | NA  |
| Flax fibre and tow                 | 773      | 14  | 3.5 | 6.4 |
| Fonio                              | 94       | 13  | 2.2 | 4.2 |
| Fruit, citrus nes                  | 512      | 1.5 | 0.3 | 2.4 |
| Fruit, fresh nes                   | 619      | 1.9 | 0.4 | 2.0 |
| Fruit, pome nes                    | 542      | 3.0 | 0.7 | 2.0 |
| Fruit, stone nes                   | 541      | 2.2 | 0.7 | 2.0 |
| Fruit, tropical fresh nes          | 603      | 2.8 | 0.7 | 2.0 |
| Garlic                             | 406      | 6.4 | 0.9 | 2.7 |
| Ginger                             | 720      | 16  | 1.3 | 16  |
| Gooseberries                       | 549      | 1.4 | NA  | NA  |
| Grapefruit (inc. pomelos)          | 507      | 1.8 | NA  | NA  |
| Grapes                             | 560      | 3.6 | 0.7 | 5.4 |
| Groundnuts, with shell             | 242      | 34  | 6.0 | 8.2 |
| Gums, natural                      | 839      | 150 | NA  | NA  |
| Hazelnuts, with shell              | 225      | 5.3 | 0.4 | 1.7 |
| Hemp tow waste                     | 777      | 3.1 | 1.1 | 3.3 |
| Hempseed                           | 336      | 35  | NA  | NA  |
| Hops                               | 677      | 19  | 1.3 | 16  |
| Jajoba seed                        | 277      | NA  | NA  | NA  |
| Jute                               | 780      | 2.7 | 1.1 | 3.3 |
| Karite nuts (sheanuts)             | 263      | 11  | NA  | NA  |
| Kiwi fruit                         | 592      | 1.4 | NA  | NA  |
| Kola nuts                          | 224      | 14  | NA  | NA  |
| Leeks, other alliaceous vegetables | 407      | 3.1 | 0.9 | 2.7 |
| Lemons and limes                   | 497      | 1.8 | NA  | NA  |
| Lentils                            | 201      | 36  | 4.4 | 16  |
| Lettuce and chicory                | 372      | 2.4 | 0.4 | 2.9 |
| Linseed                            | 333      | 29  | NA  | NA  |
| Lupins                             | 210      | 44  | 5.1 | 15  |
| Maize                              | 56       | 12  | 3.4 | 4.3 |



| Item                         | FAO code | N   | P   | K   |
|------------------------------|----------|-----|-----|-----|
| Maize, green                 | 446      | 3.6 | 0.8 | 2.8 |
| Mangoes, mangosteens, guavas | 571      | 3.0 | 0.6 | 3.8 |
| Manila fibre (abaca)         | 809      | 2.9 | 1.1 | 3.3 |
| Melonseed                    | 299      | 29  | NA  | NA  |
| Millet                       | 79       | 20  | 4.2 | 5.4 |
| Mushrooms and truffles       | 449      | 9.3 | NA  | NA  |
| Mustard seed                 | 292      | 40  | NA  | NA  |
| Nutmeg, mace and cardamoms   | 702      | 13  | 1.3 | 16  |
| Nuts nes                     | 234      | 11  | NA  | NA  |
| Oats                         | 75       | 22  | 3.6 | 4.5 |
| Oil palm fruit               | 254      | 3.6 | 0.7 | 4.1 |
| Oilseeds nes                 | 339      | 13  | 4.6 | 22  |
| Okra                         | 430      | 2.8 | 0.5 | 3.0 |
| Olives                       | 260      | 7.3 | 11  | 10  |
| Onions, dry                  | 403      | 2.6 | 0.7 | 2.2 |
| Onions, shallots, green      | 402      | 2.6 | 0.5 | 1.8 |
| Oranges                      | 490      | 3.1 | 0.4 | 4.6 |
| Papayas                      | 600      | 60  | 18  | 140 |
| Peaches and nectarines       | 534      | 2.2 | 0.4 | 3.3 |
| Pears                        | 521      | 1.8 | 0.4 | 2.6 |
| Peas, dry                    | 187      | 38  | 8.7 | 9.8 |
| Peas, green                  | 417      | 17  | 3.3 | 10  |
| Pepper (piper spp.)          | 687      | 9.8 | 1.3 | 16  |
| Peppermint                   | 748      | 11  | 1.3 | 16  |
| Persimmons                   | 587      | 1.0 | NA  | NA  |
| Pigeon peas                  | 197      | NA  | NA  | NA  |
| Pineapples                   | 574      | 1.0 | 0.2 | 1.4 |
| Pistachios                   | 223      | 17  | NA  | NA  |
| Plantains and others         | 489      | 3.3 | 0.3 | 5.0 |
| Plums and sloes              | 536      | 2.4 | NA  | NA  |
| Poppy seed                   | 296      | 29  | NA  | NA  |
| Potatoes                     | 116      | 2.5 | 1.0 | 6.2 |
| Pulses nes                   | 211      | 26  | 4.2 | 13  |
| Pumpkins, squash and gourds  | 394      | 2.7 | 0.4 | 3.2 |
| Pyrethrum, dried             | 754      | 14  | 1.3 | 16  |
| Quinces                      | 523      | 0.3 | NA  | NA  |
| Quinoa                       | 92       | 19  | NA  | NA  |
| Ramie                        | 788      | 4.0 | 1.1 | 3.3 |
| Rapeseed                     | 270      | 31  | 5.9 | NA  |
| Raspberries                  | 547      | 1.4 | NA  | NA  |
| Rice, paddy                  | 27       | 13  | 2.8 | 3.0 |
| Roots and tubers nes         | 149      | 4.4 | 0.3 | 2.9 |

| Item                                         | FAO code | N   | P   | K   |
|----------------------------------------------|----------|-----|-----|-----|
| Rubber, natural                              | 836      | 7.2 | 1.3 | 4.4 |
| Rye                                          | 71       | 21  | 3.6 | 4.6 |
| Safflower seed                               | 280      | 30  | 5.4 | 19  |
| Seed cotton                                  | 328      | 56  | 11  | 32  |
| Sesame seed                                  | 289      | 26  | 5.1 | 9.7 |
| Sisal                                        | 789      | 5.0 | 1.1 | 3.3 |
| Sorghum                                      | 83       | 15  | 4.5 | 4.2 |
| Soybeans                                     | 236      | 59  | 8.1 | 18  |
| Spices nes                                   | 723      | 13  | 1.0 | 8.8 |
| Spinach                                      | 373      | 4.0 | 0.6 | 3.7 |
| Strawberries                                 | 544      | 5.5 | 1.7 | 8.3 |
| String beans                                 | 423      | 3.0 | 0.7 | 2.2 |
| Sugar beet                                   | 157      | 2.1 | 0.5 | 2.3 |
| Sugar cane                                   | 156      | 4.7 | 0.3 | 1.3 |
| Sugar crops nes                              | 161      | 0.0 | NA  | NA  |
| Sunflower seed                               | 267      | 24  | 3.9 | 6.5 |
| Sweet potatoes                               | 122      | 3.4 | 0.8 | 6.9 |
| Tallowtree seed                              | 305      | NA  | NA  | NA  |
| Tangerines, mandarins, clementines, satsumas | 495      | 1.9 | 0.4 | 1.3 |
| Taro (cocoyam)                               | 136      | 3.7 | 1.1 | 3.3 |
| Tea                                          | 667      | 19  | 2.6 | 15  |
| Tobacco, unmanufactured                      | 826      | 42  | 6.6 | 48  |
| Tomatoes                                     | 388      | 1.4 | 0.2 | 2.4 |
| Triticale                                    | 97       | 17  | 2.9 | 4.2 |
| Tung nuts                                    | 275      | 48  | NA  | NA  |
| Vanilla                                      | 692      | 8.5 | 1.3 | 16  |
| Vegetables, fresh nes                        | 463      | 5.6 | 0.9 | 2.6 |
| Vegetables, leguminous nes                   | 420      | 4.9 | 1.1 | 3.3 |
| Vetches                                      | 205      | 34  | 4.0 | 17  |
| Walnuts, with shell                          | 222      | 22  | 4.4 | 10  |
| Watermelons                                  | 567      | 1.8 | NA  | NA  |
| Wheat                                        | 15       | 21  | 4.2 | 5.2 |
| Yams                                         | 137      | 2.1 | NA  | NA  |
| Yautia (cocoyam)                             | 135      | 3.9 | 1.1 | 3.3 |

**Supplementary Material 4- Uncertainties of Cropland Nutrient Budget components quantified as coefficients of variation.**

100

**Supplementary Table 4: Estimates of coefficient of variation percentages (CV%) for important items\* from components of the Cropland Nutrient Budget .**

| Component of budget                                                                                    | Item                                 | FAO value for 2020 | Units                                      | Other reported values (and sources of data used)                            | CV% |
|--------------------------------------------------------------------------------------------------------|--------------------------------------|--------------------|--------------------------------------------|-----------------------------------------------------------------------------|-----|
| Cropland area (Area)                                                                                   |                                      | 1562               | Million ha                                 | 1215-2002 (range), 1540 (mean) +/- 370 (sd) (Tubiello et al., 2023)         | 24% |
| Crop production (Prod) (select main crops only)                                                        | Total grains                         | 3007               | Million t                                  | 2725-3007 (range), 2866 (mean) +/- 199 (sd) (FAO, 2022b; USDA, 2023)        | 7%  |
| Livestock numbers (Livestock n) for manure applied to soils (MAS) (select main livestock classes only) | Cattle                               | 1523               | Million head                               | 1281-1523 (range), 1403 (mean)+/-121 (sd) (FAO, 2022b; USDA, 2023)          | 12% |
|                                                                                                        | Swine/pigs                           | 938                | Million head                               | 938-1090 (range), 1014 (mean)+/- 77 (sd) (FAO, 2022b; USDA, 2023)           | 11% |
| Livestock manure coefficients for manure applied to soils (MAS) (N content)                            | Dairy cattle                         | 47                 | kg N head <sup>-1</sup> year <sup>-1</sup> | 47-98 (range), 80 (mean) +/- 29 (sd) (Sheldrick et al., 2003; IPCC, 2006b)  | 36% |
|                                                                                                        | Non-dairy cattle                     | 14                 | kg N head <sup>-1</sup> year <sup>-1</sup> | 14-101 (range), 61 (mean) +/- 36 (sd) (Sheldrick et al., 2003; IPCC, 2006b) | 59% |
|                                                                                                        | Swine (sows, boars and to slaughter) | 34                 | kg N head <sup>-1</sup> year <sup>-1</sup> | 11-38 (range), 23 (mean) +/- 11 (sd) (Sheldrick et al., 2003; IPCC, 2006b)  | 48% |
| Synthetic fertilizer use (SF)                                                                          | N                                    | 532                | Million tonnes year <sup>-1</sup>          | (FAO, 2022b; IFA, 2022a)**                                                  | 21% |

| Component of budget                     | Item                    | FAO value for 2020 | Units                                    | Other reported values (and sources of data used)                                                                                       | CV% |
|-----------------------------------------|-------------------------|--------------------|------------------------------------------|----------------------------------------------------------------------------------------------------------------------------------------|-----|
|                                         |                         |                    | Million                                  |                                                                                                                                        |     |
|                                         | P                       | 97                 | tonnes year <sup>-1</sup>                | (FAO, 2022b; IFA, 2022a)**                                                                                                             | 28% |
|                                         |                         |                    | Million                                  |                                                                                                                                        |     |
|                                         | K                       | 147                | tonnes year <sup>-1</sup>                | (FAO, 2022b; IFA, 2022a)**                                                                                                             | 28% |
| <hr/>                                   |                         |                    |                                          |                                                                                                                                        |     |
| Fraction of SF applied to cropland (CF) | N                       | 97                 | %                                        | Across all countries: 10-100 (range), 97 (mean) +/- 11 (sd) (Table 1)                                                                  | 11% |
|                                         | P                       | 98                 | %                                        | Across all countries: 10-100 (range), 98 (mean) +/- 9 (sd) (Table 1)                                                                   | 9%  |
|                                         | K                       | 98                 | %                                        | Across all countries: 10-100 (range), 98 (mean) +/- 10 (sd) (Table 1)                                                                  | 10% |
| <hr/>                                   |                         |                    |                                          |                                                                                                                                        |     |
| N deposition (ND)                       | Various based on models | 6.7                | kg N ha <sup>-1</sup> year <sup>-1</sup> | Across all countries: 0.5-17 (range), 5.1 (mean) +/- 3.5 (sd) (estimates from Vishwakarma et al. (2022) AH model: ACCMIP and HYDE)     | 69% |
|                                         | Various based on models | 6.7                | kg N ha <sup>-1</sup> year <sup>-1</sup> | Across all countries: 0.7-17 (range), 5.5 (mean) +/- 3.5 (sd) (estimates from Vishwakarma et al. (2022) AL model: ACCMIP and LUH2)     | 64% |
|                                         | Various based on models | 6.7                | kg N ha <sup>-1</sup> year <sup>-1</sup> | Across all countries: 0.4-35 (range), 6.8 (mean) +/- 5.2 (sd) (estimates from Vishwakarma et al. (2022) WH model: Wang et al and HYDE) | 76% |

| Component of budget       | Item                    | FAO value for 2020                  | Units                                    | Other reported values (and sources of data used)                                                                                      | CV% |
|---------------------------|-------------------------|-------------------------------------|------------------------------------------|---------------------------------------------------------------------------------------------------------------------------------------|-----|
|                           | Various based on models | 6.7                                 | kg N ha <sup>-1</sup> year <sup>-1</sup> | Across all countries: 0.4-35 (range), 6.7 (mean) +/- 5.2(sd) (estimates from Vishwakarma et al. (2022) WL model: Wang et al and LUH2) | 78% |
| Biological N fixation     | Soybeans                | Various, region and yield dependent | kg N fixed and tonne DM <sup>-1</sup>    | 16-89 (range) 55 (mean) +/-17 (sd) (Peoples et al., 2021; Herridge et al., 2022)***                                                   | 32% |
|                           | Sugar cane              |                                     | kg N ha <sup>-1</sup>                    | 25-150 (range), 75 (mean) +/- 66 (sd) (Peoples et al., 2021; Herridge et al., 2022)                                                   | 88% |
|                           | Rice                    |                                     | kg N ha <sup>-1</sup>                    | 20-90 (range), 39 (mean) +/- 27 (sd) (Peoples et al., 2021; Herridge et al., 2022)                                                    | 69% |
| Crop removal coefficients | Maize                   | 12.4                                | kg N tonne product <sup>-1</sup>         | 8-18 (range) 14 (mean) +/-3 (sd) (Ludemann et al., 2023a)                                                                             | 19% |
|                           | Rice, paddy             | 12.9                                | kg N product <sup>-1</sup>               | 11-12 (range) 11 (mean) +/-0 (sd) (Ludemann et al., 2023a)                                                                            | 3%  |
|                           | Soybeans                | 59.3                                | kg N product <sup>-1</sup>               | 53-83 (range) 59 (mean) +/-12 (sd) (Ludemann et al., 2023a)                                                                           | 20% |
|                           | Wheat                   | 20.9                                | kg N product <sup>-1</sup>               | 17-27 (range) 21 (mean) +/-3 (sd) (Ludemann et al., 2023a)                                                                            | 14% |
|                           | Maize                   | 3.4                                 | kg P product <sup>-1</sup>               | 1-5 (range) 2 (mean) +/-1 (sd) (Ludemann et al., 2023a)                                                                               | 21% |
|                           | Rice, paddy             | 2.8                                 | kg P product <sup>-1</sup>               | 1-4 (range) 2 (mean) +/-0 (sd) (Ludemann et al., 2023a)                                                                               | 17% |
|                           | Soybeans                | 8.1                                 | kg P product <sup>-1</sup>               | 4-8 (range) 6 (mean) +/-1 (sd) (Ludemann et al., 2023a)                                                                               | 24% |

| Component of budget | Item        | FAO value for 2020 | Units                      | Other reported values (and sources of data used)           | CV% |
|---------------------|-------------|--------------------|----------------------------|------------------------------------------------------------|-----|
|                     | Wheat       | 4.2                | kg P product <sup>-1</sup> | 1-5 (range) 3 (mean) +/-1 (sd) (Ludemann et al., 2023a)    | 19% |
|                     | Maize       | 4.3                | kg K product <sup>-1</sup> | 2-10 (range) 3 (mean) +/-1 (sd) (Ludemann et al., 2023a)   | 18% |
|                     | Rice, paddy | 3.0                | kg K product <sup>-1</sup> | 1-4 (range) 2 (mean) +/-1 (sd) (Ludemann et al., 2023a)    | 22% |
|                     | Soybeans    | 18.3               | kg K product <sup>-1</sup> | 16-27 (range) 22 (mean) +/-7 (sd) (Ludemann et al., 2023a) | 34% |
|                     | Wheat       | 5.2                | kg K product <sup>-1</sup> | 3-7 (range) 4 (mean) +/-1 (sd) (Ludemann et al., 2023a)    | 13% |

\*Items were selected based on relative contribution to each component of the Cropland Nutrient Budget and availability of data.

\*\*IFA did not have fertilizer data for every country. Therefore the CV% was based on variation in estimates of fertilizer use by country for countries that had data available from IFA *and* FAO.

\*\*\*Raw data from Peoples et al. (2021) were used for estimating the CV% (Giller, K, pers.comms November 2022).

### Supplementary Material 5- Case studies

The CNB currently attributes manure from livestock across each country to cropland area based on the proportions shown in Table 1. However, as described in Supplementary Material 1, these proportions are based on apportioning the fraction of total fertilizer used in a country to that applied to cropland. In addition, none of the nutrient outputs in removed herbage from permanent and temporary meadows and pastures or maize for silage are accounted for in the CNB, nor does it account for manure exported from one country to another. Therefore several countries were examined more deeply as case studies to quantify some of the methodological limitations of the current cropland nutrient budget. These countries included the Netherlands, Ireland, Denmark and New Zealand and were chosen based on those having a significant number of livestock and areas of permanent and temporary meadows and pasture and maize for silage relative to the total size of agricultural land. Of these case study countries, the Netherlands exports a significant percentage of its manure from livestock to other countries (~10%) (CBS, 2023) and so it was used for the most detailed analysis.

To account for the 10% of manure from livestock exported from the Netherlands, scenario b (Supplementary Table 5) was modelled by decreasing N inputs by the equivalent of 10% of the quantity of total manure N from livestock for the country. This resulted in a  $10 \text{ kg N ha}^{-1} \text{ year}^{-1}$  decrease in N inputs to cropland and a ~7% (~2 percentage point increase to 32%) increase in N use efficiency, across cropland area compared with the current CNB (Supplemental Table 5, columns a and b).

Scenarios c and d aimed to quantify the effects on N surpluses and NUE if N in herbage removed from ‘temporary meadows and pastures’, and ‘maize as silage’ were included in the total quantity of N outputs respectively. Scenario e quantified the combined effect of scenarios c and d. Accounting for these scenarios made a greater effect on N surplus and NUE estimates than when manure exports were accounted for. Accounting for N outputs from herbage removed from temporary meadows and pastures resulted in a NUE of 50% (20 percentage points greater than results from the current CNB) and a  $50 \text{ kg ha}^{-1} \text{ year}^{-1}$  lower N surplus compared with the current CNB (Supplementary Table 5). Accounting for additional N outputs from herbage removed from maize for silage resulted in a NUE of 58% (28 percentage points greater than the current CNB) and a  $70 \text{ kg ha}^{-1} \text{ year}^{-1}$  lower N surplus compared with the current CNB (Supplementary Table 5). Accounting for N outputs from herbage removed from temporary meadows and pastures and maize for silage resulted in a NUE of 77% (47 percentage points greater than results from the current CNB) and a  $113 \text{ kg ha}^{-1} \text{ year}^{-1}$  lower N surplus compared with the current CNB (Supplementary Table 5). Unsurprisingly values from scenarios c, d and e are more comparable (than the original CNB values) with results from surveys of Dutch farms (with values of 54% and 52% for NUE for arable and dairy farms respectively, [www.agrimatie.nl](http://www.agrimatie.nl)) considering results from the Dutch surveys had more refined land area coverage.

The Netherlands is an extreme case in how it is effected by the limitations of the current methodology for the CNB. Ireland, Denmark and New Zealand are other examples of countries whose NUE may be effected by the limitations of the current CNB methodology. Currently they have NUE values of 38%, 55% and 50% respectively (Supplementary Table 6). NUE values for countries like these may increase in the future if nutrients removed as fodder and forage crops are better accounted for. Overall,

135 this shows that accounting for N outputs from temporary meadows and pastures and short term fodder crops (such as maize for silage), (and to a lesser extent manure exports on total N inputs) can substantially increase estimates of NUE. This highlights the importance of properly accounting for N outputs from fodder and forage crops in future iterations of the CNB, especially for countries with significant areas of these fodder or forage crops and numbers of livestock.

140 **Supplementary Table 5: Comparison in estimates of cropland N budget (CNB) components and nitrogen use efficiency (NUE) % for the Netherlands for 2019 based on current cropland nutrient budget data (a), accounting for 10% of livestock manure exported (b), accounting for N outputs as temporary meadows and pastures (c), accounting for N outputs as maize silage (d), accounting for N outputs as permanent meadows and pastures\*.**

| Item                                                    | Scenario    |                                        |                                                                  |                                                |                                              |  |
|---------------------------------------------------------|-------------|----------------------------------------|------------------------------------------------------------------|------------------------------------------------|----------------------------------------------|--|
|                                                         | a)          | b)                                     | c)                                                               | d)                                             | e)                                           |  |
|                                                         | Current CNB | CNB accounting for 10% exported manure | CNB accounting for N outputs from temporary meadows and pastures | CNB accounting for N outputs from maize silage | CNB accounting for scenario c and d combined |  |
| <b>N inputs (tonnes)</b>                                | 260000      | 250,000                                | 260000                                                           | 260000                                         | 260000                                       |  |
| <b>N outputs (tonnes)</b>                               | 79000       | 79000                                  | 130000                                                           | 150,000                                        | 200000                                       |  |
| <b>N surplus (tonnes)</b>                               | 181000      | 171,000                                | 130000                                                           | 110000                                         | 60,000                                       |  |
| <b>N inputs (kg ha<sup>-1</sup> year<sup>-1</sup>)</b>  | 250         | 240                                    | 250                                                              | 250                                            | 250                                          |  |
| <b>N outputs (kg ha<sup>-1</sup> year<sup>-1</sup>)</b> | 75          | 75                                     | 120                                                              | 140                                            | 190                                          |  |
| <b>N surplus (kg ha<sup>-1</sup> year<sup>-1</sup>)</b> | 170         | 160                                    | 120                                                              | 100                                            | 57                                           |  |
| <b>NUE (%)</b>                                          | 30%         | 32%                                    | 50%                                                              | 58%                                            | 77%                                          |  |
| <b>% change in N surplus relative to Current CNB</b>    | 0%          | -6%                                    | -28%                                                             | -39%                                           | -67%                                         |  |



% change in

NUE relative to 0% 7% 67% 93% 157%

Current CNB

\*Values are rounded to 2 significant figures, Scenario b assumed 10% of manure from livestock in the Netherlands was exported (CBS, 2023), scenario c assumed 216,000ha temporary meadow and pastures, 11,000kg DM ha<sup>-1</sup> production (Schils et al., 2020) , 0.7 utilization of production, 0.032 kg N kg<sup>-1</sup> herbage nutrient concentration, scenario d assumed 187,000ha maize silage (CBS, 2023), 14,000kg DM ha<sup>-1</sup> production, 0.7 utilization of production 0.036 kg N kg<sup>-1</sup> (Supplemental Table 5) herbage nutrient concentration.

145 **Supplementary Table 6: Agricultural land area (1000 ha) and nitrogen use efficiency (NUE) % for a selected group of countries with significant areas of permanent meadows and pastures and number of livestock for 2019.**

| Item                                         | Netherlands | Ireland     | Denmark          | New Zealand |
|----------------------------------------------|-------------|-------------|------------------|-------------|
| Land under temporary crops                   | 787         | 355         | 1794             | 414         |
| Land under temp. meadows and pastures        | 216         | 87          | 525              | 63          |
| Land with temporary fallow                   | 8           | 1           | 77               | 69          |
| Land under permanent crops                   | 38          | 1           | 23               | 74          |
| <b>Cropland</b>                              | <b>1049</b> | <b>444</b>  | <b>2419</b>      | <b>620</b>  |
| Perm. meadows & pastures – Cultivated        | 691         | 3559        | 207              | NA          |
| Perm. meadows & pastures - Nat. growing      | 77          | 522         | 0                | NA          |
| <b>Land under perm. meadows and pastures</b> | <b>768</b>  | <b>4080</b> | <b>207</b>       | <b>9725</b> |
| NUE%                                         | 31%         | 38%         | 55%              | 50%         |
|                                              | ~187        | ~17         | 186              | ~55         |
| Maize area for silage                        | (CBS, 2023) | (CSO, 2023) | (Stadbank, 2023) | (FAR, 2020) |
| Silage maize area as % of cropland           | 18%         | 4%          | 10%              | 13%         |
